# Supplementary material for: Autophagy deficiency protects against ocular hypertension and neurodegeneration in experimental and spontaneous glaucoma mouse models
Source: PubMed Central journal article supplement (PMC10449899; doi:10.1038/s41419-023-06086-3), 2023-08-24

# Supplemental Figure 1

(B)

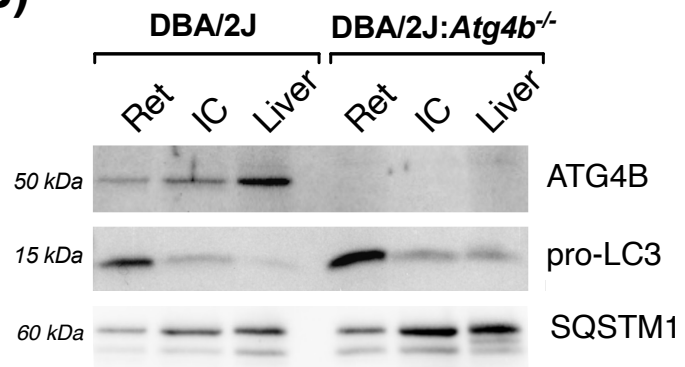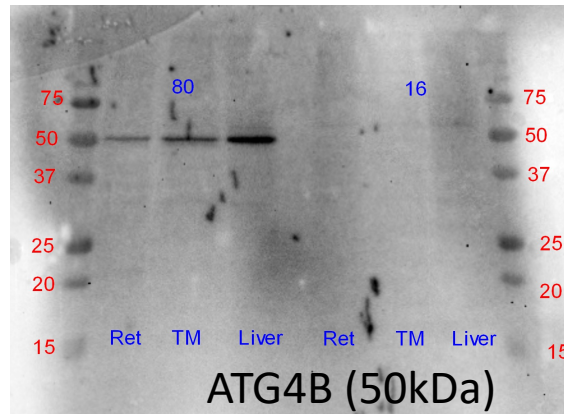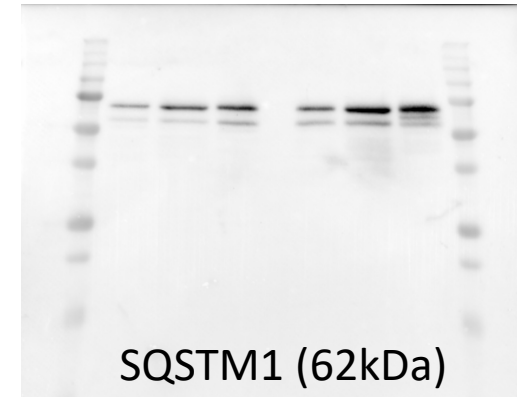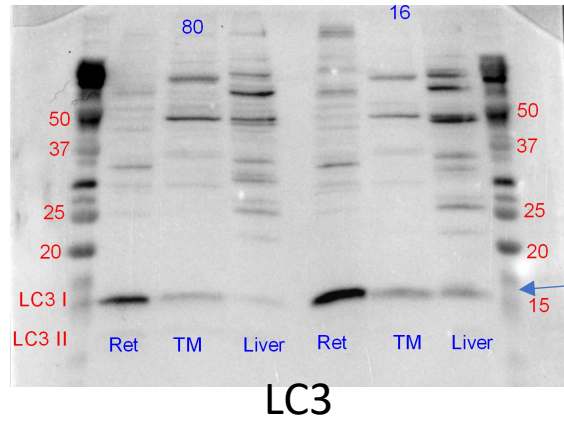

LC3  
(pro-LC3 and LC3-I run around 15-20kDa)

## Supplemental Figure 2

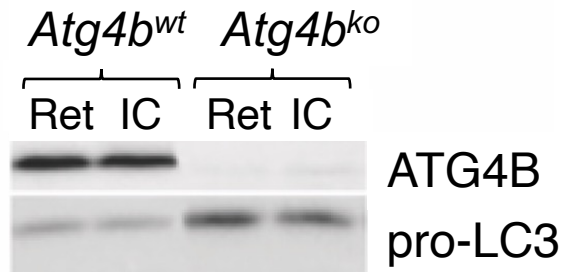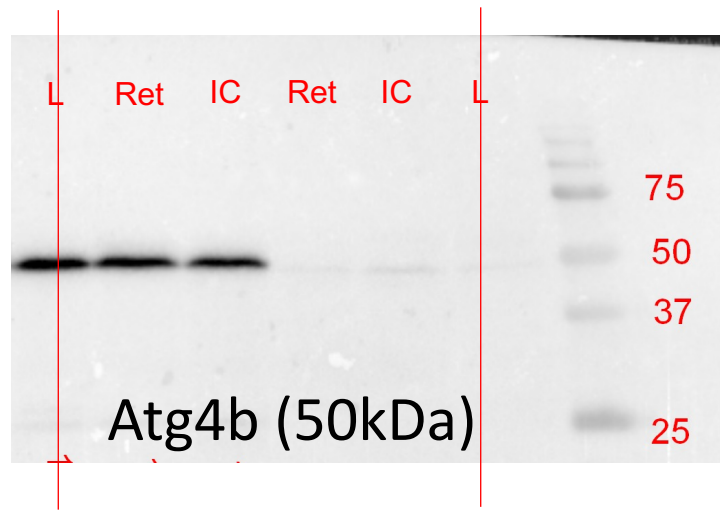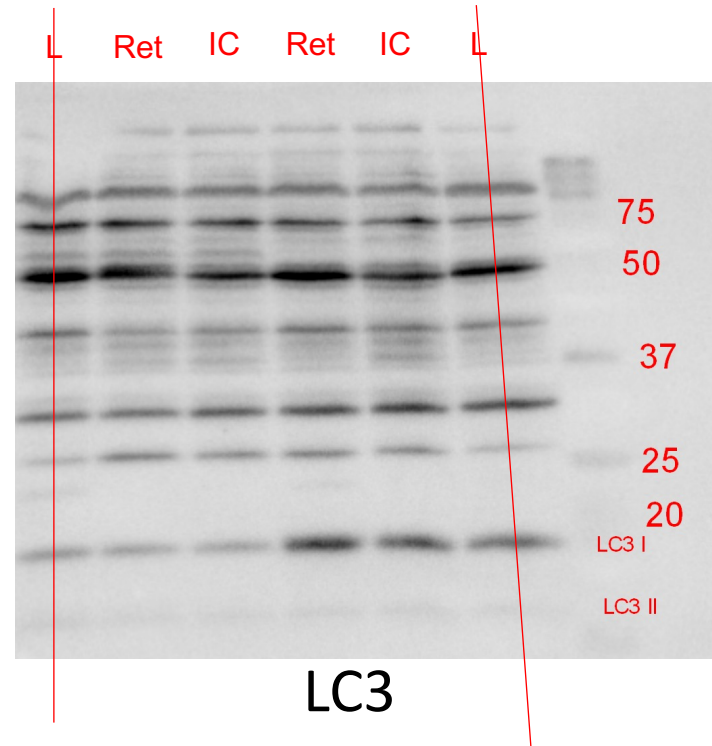

*non specific bands from Atg4a antibodies- not included in the manuscript*

**LC3**  
*(pro-LC3 and LC3-I run around 15-20kDa)*

# Supplemental Figure 3

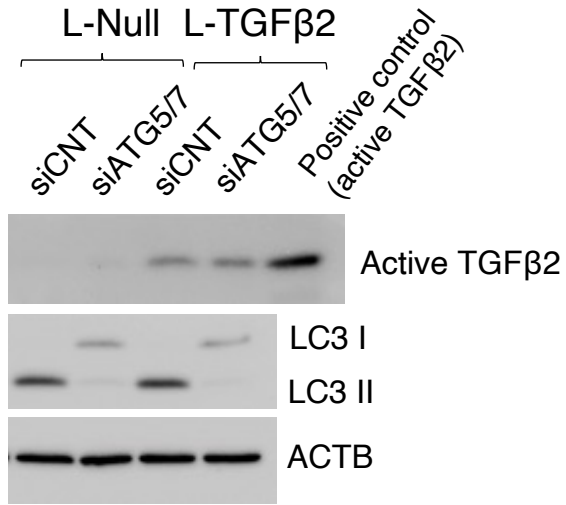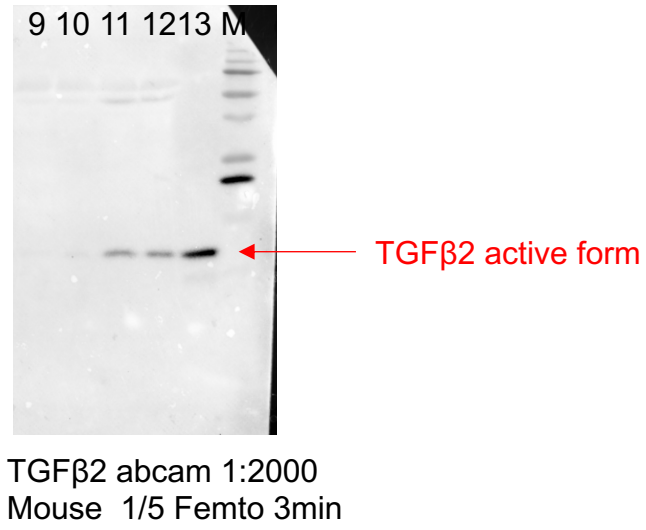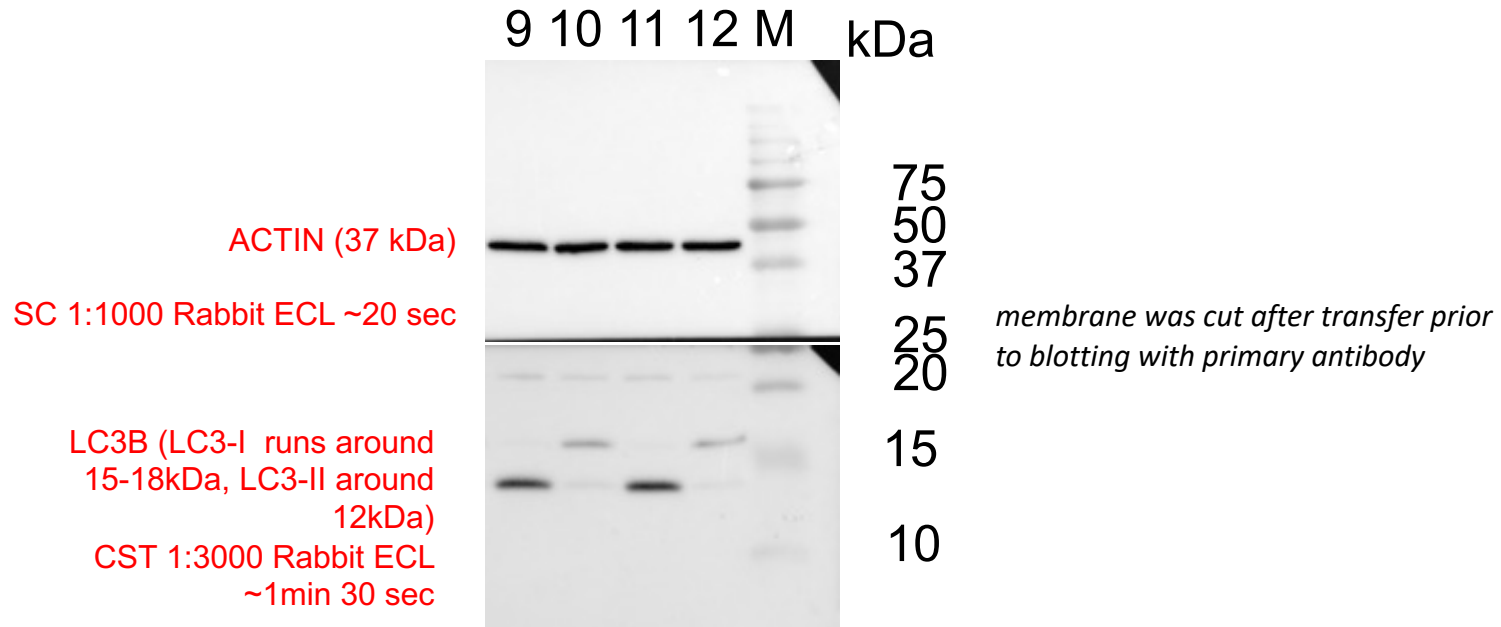

Figure 6

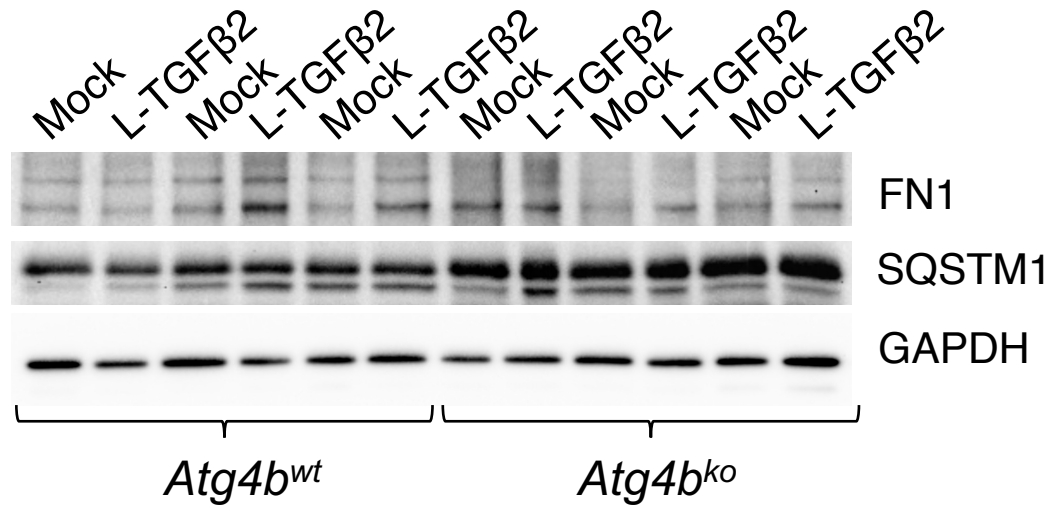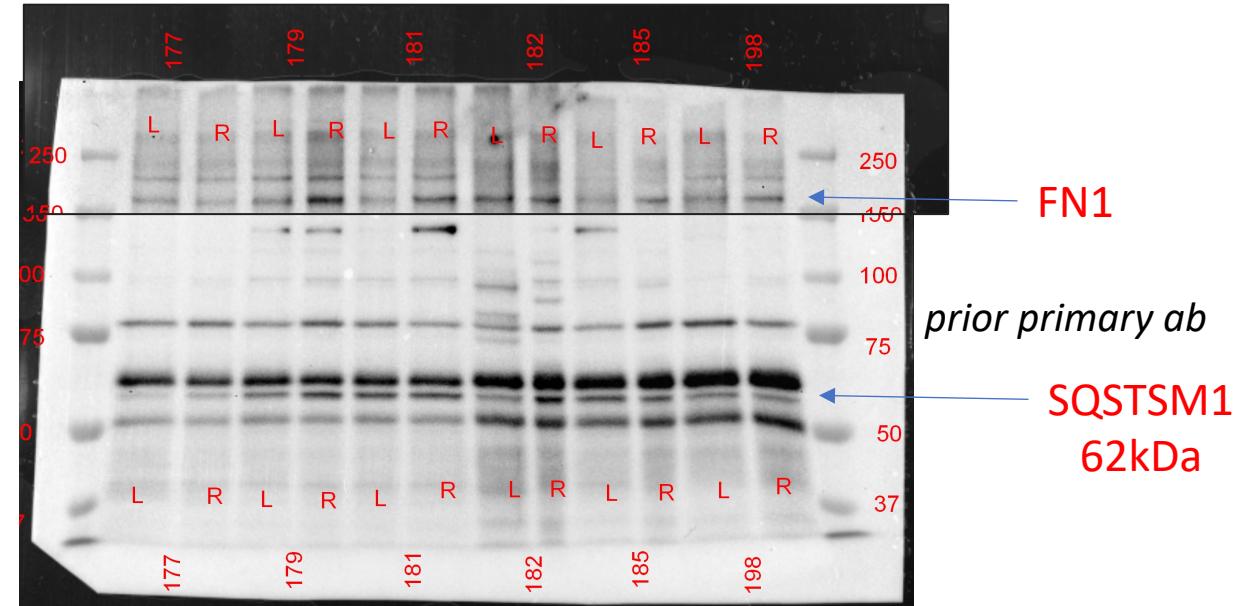

membrane was cut after transfer prior to blotting with primary antibody

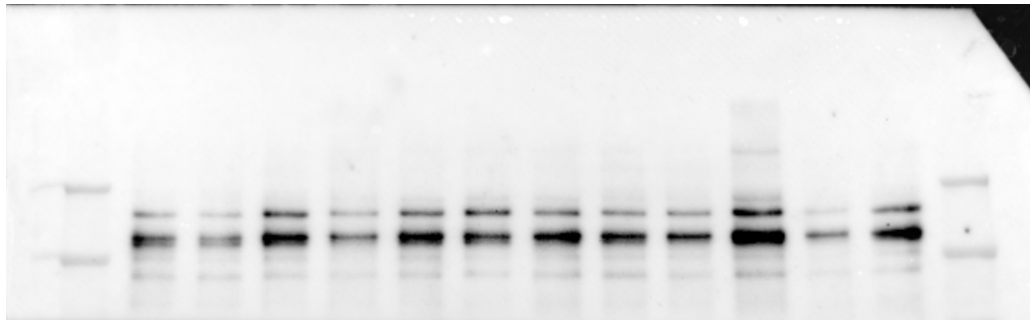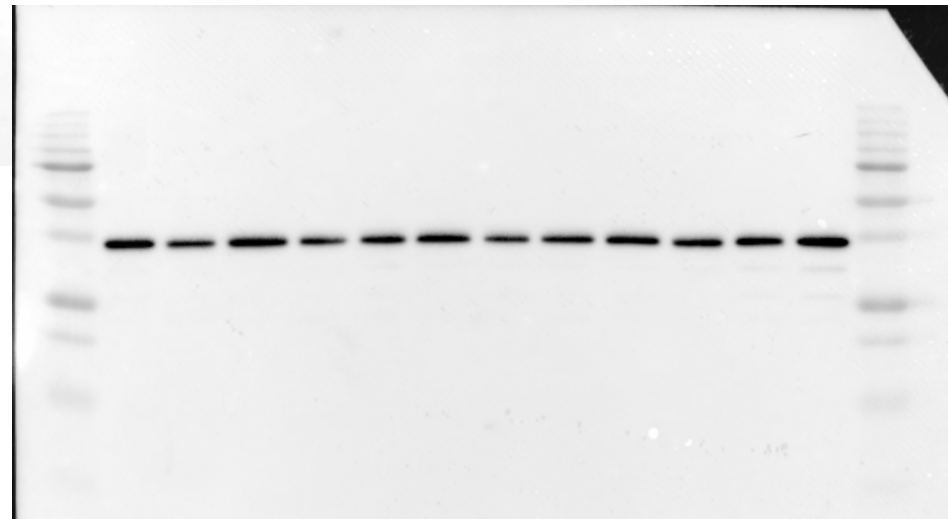

GAPDH  
36kDa

Figure 6

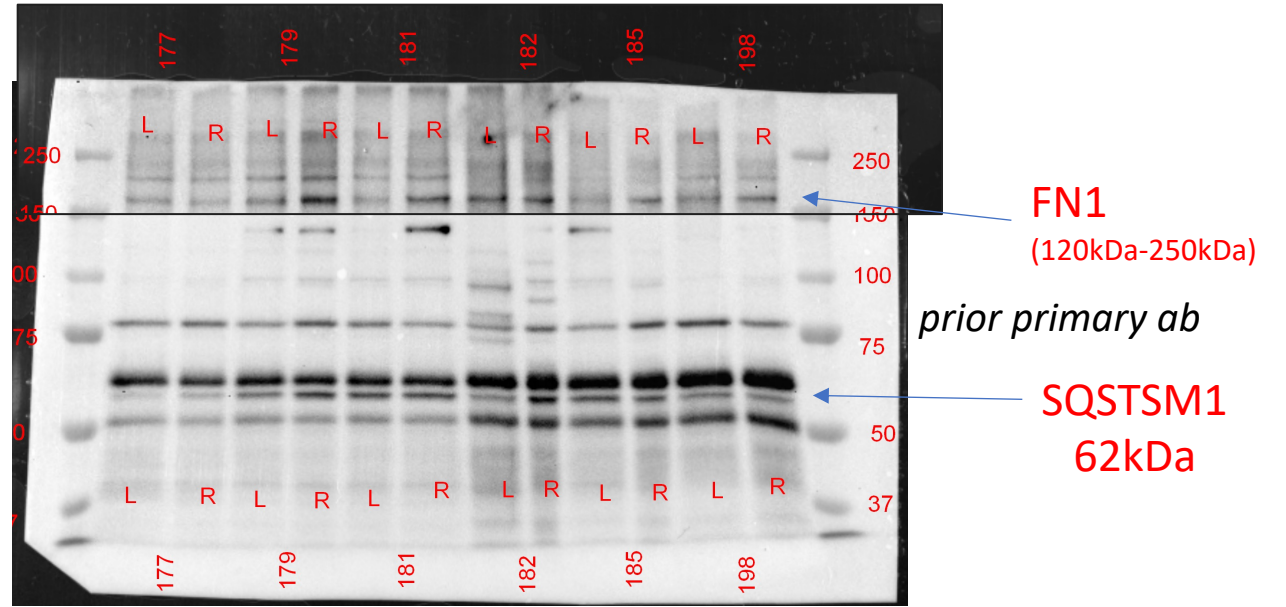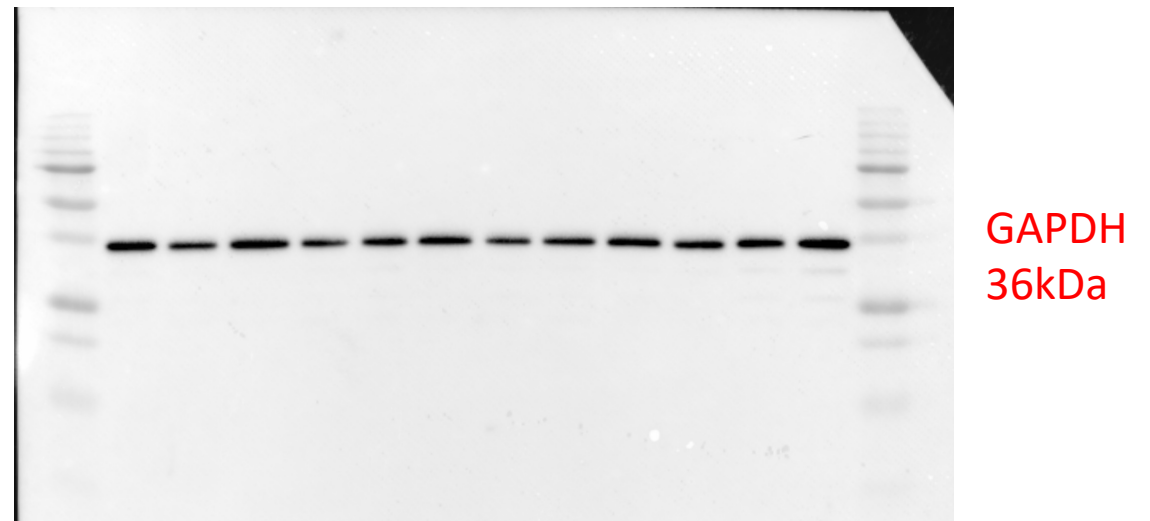

Supplement: 41419_2023_6086_MOESM2_ESM.pdf [file 41419_2023_6086_MOESM2_ESM.pdf]
